# Supplementary material for: Bird color and taxonomic diversity are negatively related to human disturbance in urban parks
Source: Copernicus journal article supplement (doi:10.5194/we-24-1-2024), 2024-02-05
Supplement: Supplementary file 1 [file we-24-1-2024-supplement.pdf]

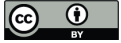

*Supplement of*

## **Bird color and taxonomic diversity are negatively related to human disturbance in urban parks**

**Lucas M. Leveau and Juan Kopp**

*Correspondence to:* Lucas M. Leveau ([lucasleveau@yahoo.com.ar](mailto:lucasleveau@yahoo.com.ar))

The copyright of individual parts of the supplement might differ from the article licence.

Tabla S1. Plumage color characteristics of bird species.

| Species                           | crown        | head         | cheek           | mantle           | primaries        | wing_coverts     | back         | rump                      | tail                            |
|-----------------------------------|--------------|--------------|-----------------|------------------|------------------|------------------|--------------|---------------------------|---------------------------------|
| <i>Agelaioides badius</i>         | brown        | brown        | brown           | brown            | rufous           | brown-<br>rufous | brown        | brown                     | black                           |
| <i>Anas flavirostris</i>          | brown        | brown        | brown           | brown            | brown            | brown            | brown        | brown                     | brown                           |
| <i>Aramaus guarauna</i>           | brown_white  | brown_white  | brown_whit<br>e | brown            | brown            | brown            | brown        | brown                     | brown                           |
| <i>Athene cunicularia</i>         | brown_white  | brown_white  | white_brown     | brown_whit<br>e  | brown_whit<br>e  | brown_white      | brown_white  | brown_whit<br>e           | brown_whit<br>e                 |
| <i>Carduelis carduelis</i>        | red          | black        | white_red       | brown            | yellow_blac<br>k | yellow_black     | brown        | white<br>green_yello<br>w | black_white<br>black_yello<br>w |
| <i>Carduelis chloris</i>          | green_yellow | green_yellow | grey            | green            | grey_yellow      | green_grey       | green        | green                     | blue                            |
| <i>Chlorostilbon lucidus</i>      | green        | green        | green           | green            | blue             | green            | green        | green                     | black                           |
| <i>Colaptes campestris</i>        | black        | black        | yellow          | yellow           | black_white      | black_white      | black_white  | white_black               | black                           |
| <i>Columba livia</i>              | grey         | grey         | grey            | green            | grey_black       | grey             | grey         | grey                      | grey_black                      |
| <i>Colaptes<br/>melanochloros</i> | black        | red          | white_red       | black_yello<br>w | black_yello<br>w | black_yellow     | black_yellow | black_yello<br>w          | black                           |
| <i>Elaenia parvirostris</i>       | olive_white  | olive        | olive           | olive            | brown_whit<br>e  | brown_white      | olive        | olive                     | olive                           |
| <i>Falco femoralis</i>            | black        | black        | black_white     | black            | black            | black            | black        | black                     | black                           |
| <i>Falco sparverius</i>           | grey         | black_brown  | white_black     | red_black        | blue_black       | blue_black       | red_black    | red                       | red_black                       |
| <i>Furnarius rufus</i>            | brown        | brown        | brown           | brown            | brown            | brown            | brown        | brown                     | rufous                          |
| <i>Guira guira</i>                | orange       | orange       | yellow          | brown_whit<br>e  | brown_whit<br>e  | brown_white      | white        | white                     | black_white                     |
| <i>Hirundo rustica</i>            | blue         | blue         | blue            | blue             | black            | blue             | blue         | blue                      | black                           |
| <i>Ixobrychus inbolucris</i>      | brown_black  | brown        | brown           | brown_black      | brown            | black_brown      | black_brown  | brown                     | brown                           |
| <i>Leucochloris albicollis</i>    | green        | green        | green           | green            | black            | green            | green        | green                     | black                           |

|                                |              |              |             |             |             |             |             |            |             |
|--------------------------------|--------------|--------------|-------------|-------------|-------------|-------------|-------------|------------|-------------|
| <i>Lepthastenura platensis</i> | black_brown  | black_brown  | white_brown | brown       | brown       | brown       | brown       | brown      | brown       |
| <i>Machetronis rixosus</i>     | grey_red     | grey         | grey        | olive       | brown       | brown       | brown       | brown      | brown       |
| <i>Milvago chimango</i>        | brown        | brown        | brown       | brown       | grey        | brown       | brown       | grey       | grey        |
| <i>Mimus saturninus</i>        | brown        | brown        | white_black | grey        | grey        | brown_white | grey        | brown      | brown       |
| <i>Molothrus bonariensis</i>   | black_blue   | black_blue   | black       | black_blue  | black       | black_blue  | black_blue  | black_blue | black       |
| <i>Molothrus rufoaxillaris</i> | black        | black        | black       | black       | black       | black       | black       | black      | black       |
| <i>Myiodinasyes maculatus</i>  | brown_yellow | brown_yellow | white_black | brown_black | brown_black | black_red   | brown_black | red_black  | red_black   |
| <i>Myiopsitta monachus</i>     | grey_green   | green        | green       | green       | blue        | green       | green       | green      | green_blue  |
| <i>Nannopterum brasilianus</i> | black        | black        | black_white | black       | black       | black       | black       | black      | black       |
| <i>Passer domesticus</i>       | grey         | grey         | white       | black_brown | black_brown | brown_white | black_brown | grey       | black       |
| <i>Patagioneas maculosa</i>    | grey         | grey         | grey        | grey        | grey        | brown_white | grey        | grey       | grey_black  |
| <i>Patagioenas picazuro</i>    | pink_purple  | pink_purple  | pink_purple | brown       | grey        | grey_white  | grey        | grey       | grey_black  |
| <i>Phimosus infuscatus</i>     | black        | black        | black       | black       | black       | black       | black       | black      | black       |
| <i>Phleocryptes melanops</i>   | brown        | brown_white  | white_brown | black_white | brown_red   | brown_red   | black_brown | brown      | black       |
| <i>Pipraeidea bonariensis</i>  | blue         | blue         | blue        | black       | blue_black  | blue_black  | black       | yellow     | black       |
| <i>Pitansus sulphuratus</i>    | black_yellow | black_white  | black       | brown       | brown       | brown       | brown       | brown      | brown       |
| <i>Polyborus plancus</i>       | black        | black        | white       | black_white | black       | black       | black       | white      | white_black |
| <i>Progne chalybea</i>         | blue         | blue         | blue        | blue        | black       | blue        | blue        | blue       | black       |
| <i>Progne elegans</i>          | blue         | blue         | blue        | blue        | black       | blue        | blue        | blue       | black       |
| <i>Pyrocephalus rubinus</i>    | red          | red          | black_red   | black       | black       | black_white | black       | black      | black       |
| <i>Rollandia rolland</i>       | black        | black        | white_black | black       | black       | black       | black       | black      | black       |
| <i>Setophaga pitaiayumi</i>    | blue         | blue         | blue        | blue        | blue        | blue        | olive       | blue       | blue        |

|                               |              |            |            |                    |                   |              |              |        |                   |
|-------------------------------|--------------|------------|------------|--------------------|-------------------|--------------|--------------|--------|-------------------|
| <i>Serpophaga subcristata</i> | grey         | grey       | grey       | grey               | black_white       | black_white  | grey         | grey   | grey              |
| <i>Sicalis flaveola</i>       | yellow       | yellow     | yellow     | yellow_black       | black_yellow      | brown_yellow | brown_yellow | yellow | black_yellow      |
| <i>Sporagra magellanica</i>   | black        | black      | black      | yellow_black_brown | black_brown       | black_yellow | yellow       | yellow | black_brown       |
| <i>Sturnus vulgaris</i>       | black        | black      | black      | white_yellow       | black_brown       | black_brown  | black_brown  | black  | black_brown       |
| <i>Syrigma sibilatrix</i>     | blue         | blue       | blue       | blue               | blue              | yellow_blue  | blue         | white  | white             |
| <i>Tachycineta leucorrhoa</i> | blue         | blue       | blue       | blue               | black_black_brown | black        | blue         | white  | black_black_brown |
| <i>Troglodytes aedon</i>      | brown        | brown      | brown      | brown              | brown             | black_brown  | brown        | rufous | brown             |
| <i>Turdus rufiventris</i>     | brown        | brown      | brown      | brown              | brown             | brown        | brown        | brown  | brown             |
| <i>Tyrannus melancholicus</i> | grey         | grey       | grey       | olive              | brown             | brown        | olive        | brown  | brown             |
| <i>Tyrannus savana</i>        | black_yellow | black      | black      | grey               | black             | grey         | grey         | black  | black             |
| <i>Vanellus chilensis</i>     | grey         | grey       | grey       | grey               | grey              | green        | grey         | grey   | white_black       |
| <i>Zenaida auriculata</i>     | blue         | grey       | grey_black | pink               | grey_black        | grey         | grey         | grey   | grey              |
| <i>Zonotrichia capensis</i>   | black_grey   | black_grey | black_grey | rufous             | brown             | brown_black  | brown        | brown  | brown             |

Continued

| Species                   | belly | breast      | throat      | dimorph | polymorphic | iridescence |
|---------------------------|-------|-------------|-------------|---------|-------------|-------------|
| <i>Agelaioides badius</i> | brown | brown       | brown       | 0       | 0           | 0           |
| <i>Anas flavirostris</i>  | brown | brown       | brown       | 0       | 0           | 0           |
| <i>Aramaus guarana</i>    | brown | brown       | brown       | 0       | 0           | 0           |
| <i>Athene cunicularia</i> | white | white_brown | brown_white | 0       | 0           | 0           |

|                                 |              |              |              |   |   |   |
|---------------------------------|--------------|--------------|--------------|---|---|---|
| <i>Carduelis carduelis</i>      | white        | brown_white  | red_white    | 0 | 0 | 0 |
| <i>Carduelis chloris</i>        | green_yellow | green_yellow | green_yellow | 1 | 0 | 0 |
| <i>Chlorostilbon lucidus</i>    | green        | green        | blue         | 1 | 0 | 1 |
| <i>Colaptes campestris</i>      | white_black  | white_black  | yellow       | 1 | 0 | 0 |
| <i>Columba livia</i>            | purple_green | purple       | grey         | 1 | 1 | 1 |
| <i>Colaptes melanochloros</i>   | black_yellow | black_yellow | black_yellow | 1 | 0 | 0 |
| <i>Elaenia parvirostris</i>     | white        | white        | white        | 0 | 0 | 0 |
| <i>Falco femoralis</i>          | red          | black_white  | white        | 1 | 0 | 0 |
| <i>Falco sparverius</i>         | white        | white_black  | white        | 1 | 0 | 0 |
| <i>Furnarius rufus</i>          | white        | brown        | white        | 0 | 0 | 0 |
| <i>Guira guira</i>              | white        | white_brown  | white_brown  | 0 | 0 | 0 |
| <i>Hirundo rustica</i>          | orange       | white        | rufous       | 0 | 0 | 1 |
| <i>Ixobrychus inbolucris</i>    | brown        | brown_white  | brown_white  | 0 | 0 | 0 |
| <i>Leucochloris albicollis</i>  | white        | black        | white        | 0 | 0 | 1 |
| <i>Lepthasthenura platensis</i> | white_brown  | grey         | white_brown  | 0 | 0 | 0 |
| <i>Machetronis rixosus</i>      | yellow       | yellow       | white        | 0 | 0 | 0 |
| <i>Milvago chimango</i>         | brown        | brown        | brown        | 0 | 0 | 0 |
| <i>Mimus saturninus</i>         | white        | white        | white        | 0 | 0 | 0 |
| <i>Molothrus bonariensis</i>    | black_blue   | black_blue   | black        | 1 | 0 | 1 |
| <i>Molothrus rufoaxillaris</i>  | black        | black        | black        | 0 | 0 | 1 |
| <i>Myiodinasyes maculatus</i>   | white_brown  | brown_white  | brown_white  | 0 | 0 | 0 |
| <i>Myiopsitta monachus</i>      | green        | grey         | grey         | 0 | 0 | 1 |
| <i>Nannopterum brasilianus</i>  | black        | black        | black        | 0 | 0 | 1 |
| <i>Passer domesticus</i>        | grey         | grey         | black        | 1 | 0 | 0 |
| <i>Patagioenas maculosa</i>     | grey         | grey         | grey         | 0 | 0 | 0 |
| <i>Patagioenas picazuro</i>     | grey         | pink_purple  | pink_purple  | 0 | 0 | 1 |

|                               |             |             |             |   |   |   |
|-------------------------------|-------------|-------------|-------------|---|---|---|
| <i>Phimosus infuscatus</i>    | black       | black       | black       | 0 | 0 | 1 |
| <i>Phleocryptes melanops</i>  | brown_white | white       | white       | 0 | 0 | 0 |
| <i>Pipraeidea bonariensis</i> | yellow      | yellow      | blue        | 1 | 0 | 0 |
| <i>Pitansus sulphuratus</i>   | yellow      | yellow      | white       | 0 | 0 | 0 |
| <i>Polyborus plancus</i>      | black       | white_black | white       | 0 | 0 | 0 |
| <i>Progne chalybea</i>        | white       | white       | grey        | 1 | 0 | 1 |
| <i>Progne elegans</i>         | black       | black       | black       | 1 | 0 | 1 |
| <i>Pyrocephalus rubinus</i>   | red         | red         | red         | 1 | 0 | 0 |
| <i>Rollandia rolland</i>      | red_black   | black       | black       | 0 | 0 | 0 |
| <i>Setophaga pitaiayumi</i>   | yellow      | yellow      | yellow      | 0 | 0 | 0 |
| <i>Serpophaga subcristata</i> | olive       | grey_white  | white       | 0 | 0 | 0 |
| <i>Sicalis flaveola</i>       | yellow      | yellow      | yellow      | 1 | 0 | 0 |
| <i>Sporagra magellanica</i>   | yellow      | yellow      | black       | 1 | 0 | 0 |
| <i>Sturnus vulgaris</i>       | balck_brown | black       | balck       | 0 | 0 | 1 |
| <i>Syrigma sibilatrix</i>     | white       | yellow      | yellow      | 0 | 0 | 0 |
| <i>Tachycineta leucorrhoa</i> | white       | white       | white       | 0 | 0 | 1 |
| <i>Troglodytes aedon</i>      | white       | brown       | white       | 0 | 0 | 0 |
| <i>Turdus rufiventris</i>     | orange      | brown       | brown_white | 0 | 0 | 0 |
| <i>Tyrannus melancholicus</i> | yellow      | yellow      | grey        | 0 | 0 | 0 |
| <i>Tyrannus savana</i>        | white       | white       | white       | 0 | 0 | 0 |
| <i>Vanellus chilensis</i>     | white       | black       | grey_black  | 0 | 0 | 1 |
| <i>Zenaida auriculata</i>     | grey        | grey        | grey        | 1 | 0 | 1 |
| <i>Zonotrichia capensis</i>   | white       | grey        | white       | 0 | 0 | 0 |

---
